# Supplementary material for: Bioassay-Guided Isolation of 2-[p-(2-Carboxyhydrazino)phenoxy]-6-(hydroxymethyl)tetrahydro-2H-pyran-3,4,5-triol from Oroxylum indicum and the Investigation of Its Molecular Mechanism Action of Apoptosis Induction
Source: MDPI journal article supplement (doi:10.3390/ph15050559), 2022-04-30
Supplement: s1 [file s1]

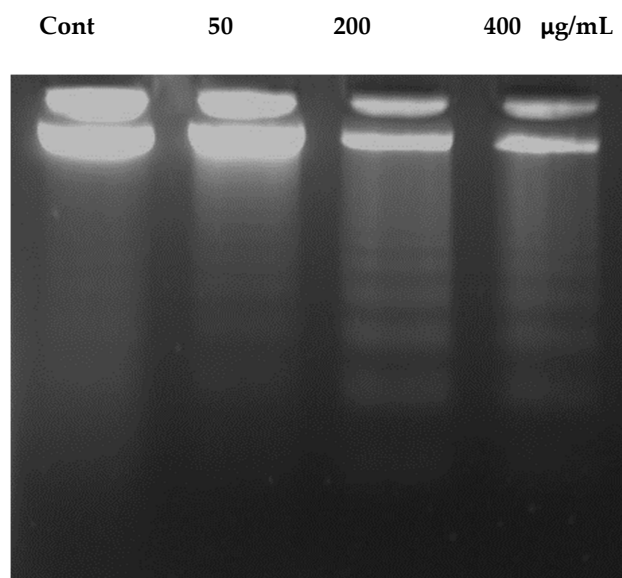

**Figure S1.** The leaf crude extract induced gDNA fragmentation in PC3 cells at 24 h of treatment in a dose-dependent manner.

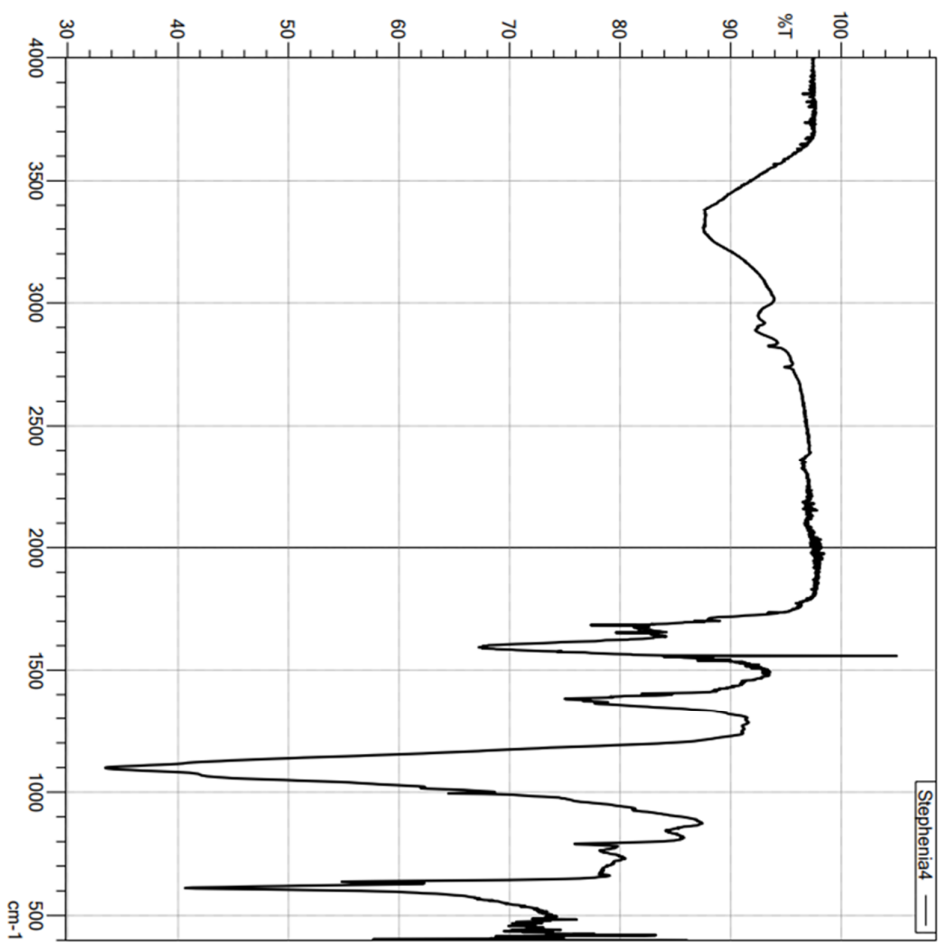

Figure S2. FTIR Spectra.

| Item |                | Value           |
|------|----------------|-----------------|
| 2    | Sample name    | met             |
| 3    | Sample ID      |                 |
| 4    | Option         |                 |
| 5    | Intensity Mode | % Transmittance |
| 6    | Apodization    | None            |
| 9    | No. of Scans   | 80              |

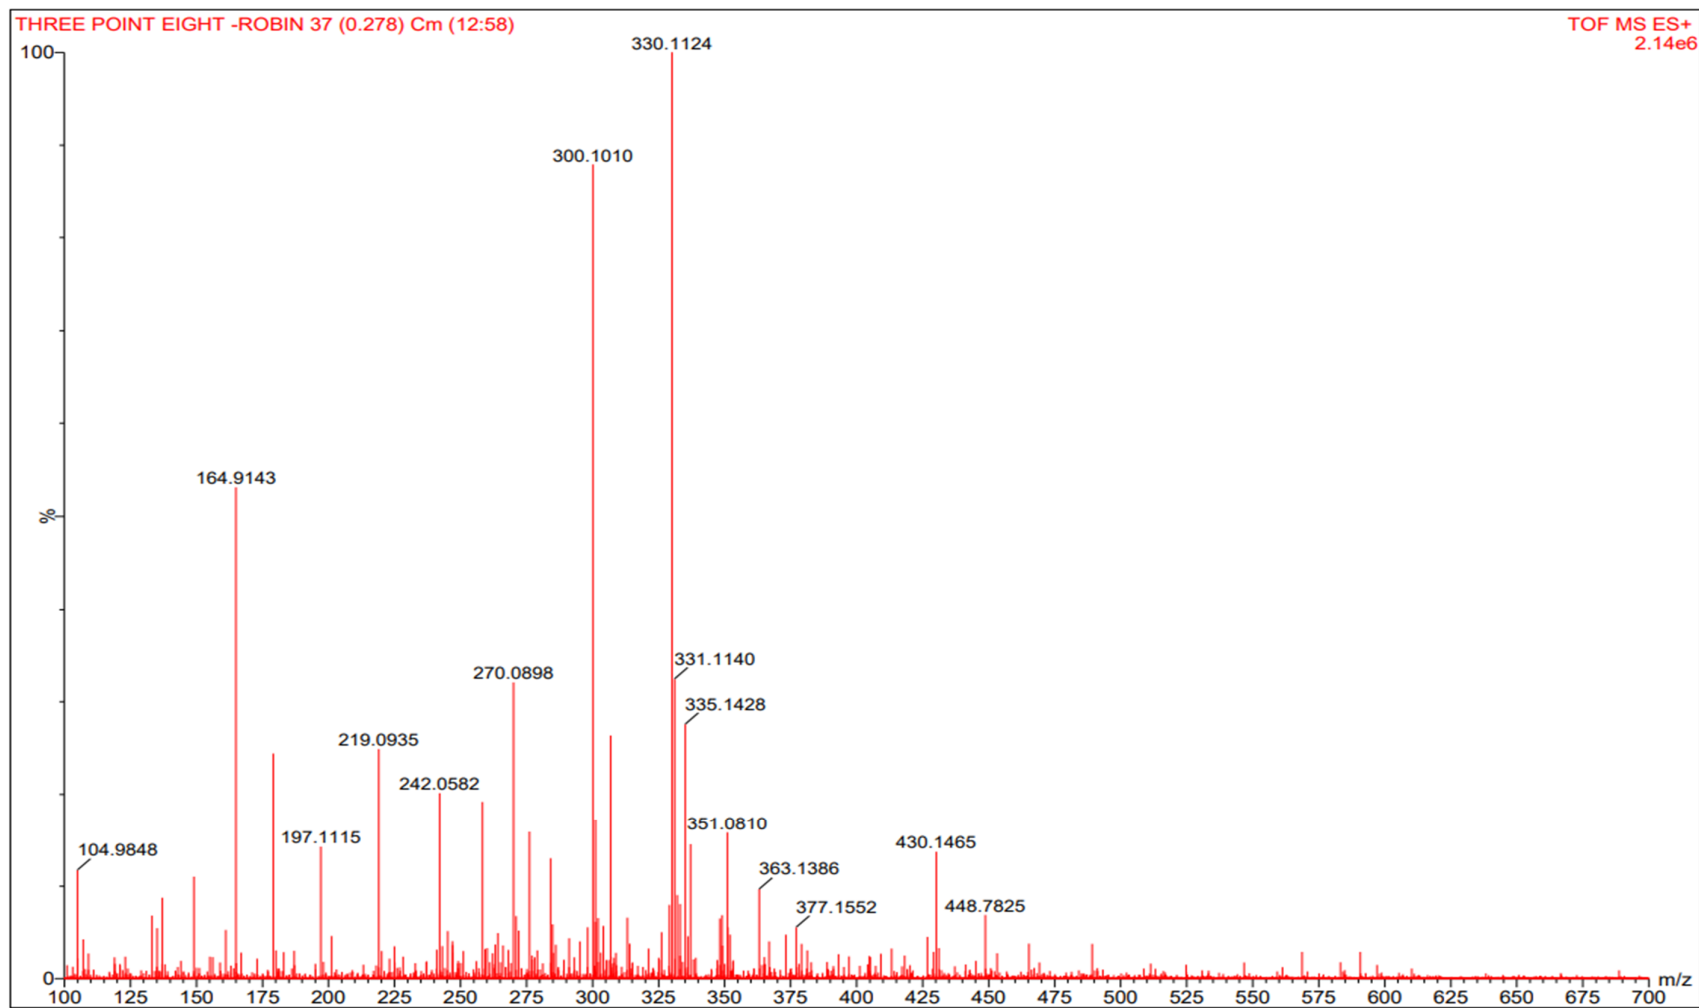

Figure S3. NMR spectra.

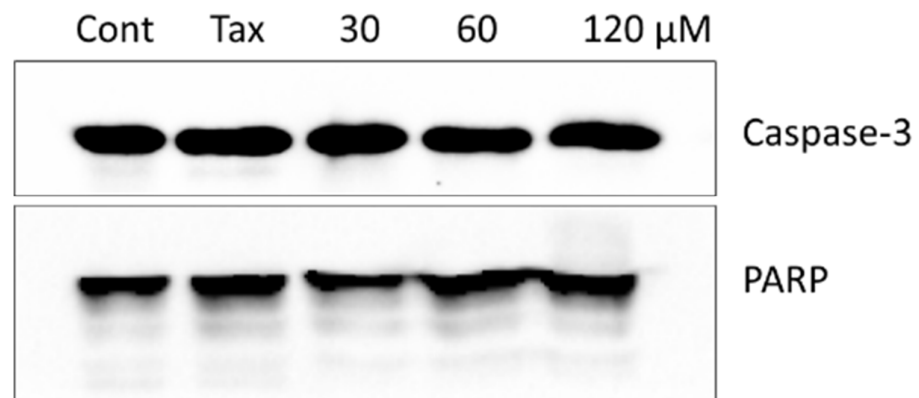

**Figure S4.** Oroxyquinone induces caspase-3 and PARP independent apoptosis in PC3 cells: PC3 cells were cultured and treated with different doses of oroxyquinone, total proteins extracted and separated by SDS-PAGE and immunoblotted using antibodies against procaspase-3 and PARP.
